# Supplementary material
Source: publisher site journal article supplement (https://www.dovepress.com/get_supplementary_file.php?f=387463.docx)
Supplement: Supplementary file 1 [file get_supplementary_file.php]

**Supplementary Table 1:** The distribution of observed genotype frequencies in the studied groups, and their consistency with the Hardy-Weinberg Equilibrium

| **Genotype** | **Observed** | **Expected** | **HWE (χ2)** | ***p*-value** |
| --- | --- | --- | --- | --- |
| **Malaria group** (No. = 141) |  |  |  |  |
| **CC** | 72 | 65.4 | 6.62 | 0.01** |
| **CT** | 48 | 61.3 |
| **TT** | 21 | 14.4 |
| **Mild malaria** (No. = 84) |  |  |  |  |
| **CC** | 24 | 24.1 | 0.002 |  |
| **CT** | 42 | 41.8 | 0.096 |
| **TT** | 18 | 18.1 |  |
| **Severe malaria** (No.= 57) |  |  |  |  |
| **CC** | 48 | 45.6 | 11.09 |  |
| **CT** | 6 | 10.7 | < 0.001*** |
| **TT** | 3 | 0.6 |  |

HWE; Hardy-Weinberg Equilibrium, **; Statistically significant at *p*-value ≤ 0.01, ***; Statistically significant at *p*-value ≤ 0.001
